# Supplementary material for: Transcriptional expression changes during compensatory plasticity in the central nervous system of the adult cricket
Source: Research Square preprint supplement (doi:10.21203/rs.3.rs-224872/v1), 2021-02-15
Supplement: Supplementary file 1 [file 147a7c8791bfd8a8e6fce949.pdf]

## Supplemental Materials

For

### Transcriptional expression changes during compensatory plasticity in the central nervous system of the adult cricket *Gryllus bimaculatus* II. Escape system plasticity in the terminal ganglia

Meera P. Prasad, Donald K. Detchou, Felicia Wang, Lisa L. Ledwidge, Sarah E. Kingston<sup>^</sup>, Hadley W. Horch<sup>\*</sup>,

Department of Biology, Bowdoin College, 6500 College Station, Brunswick, Maine 04011 USA.

Current address:

<sup>^</sup>School of Marine Sciences and Darling Marine Center, University of Maine, 193 Clarks Cove Rd., Walpole, ME 04573 USA;

<sup>\*</sup>University of California Santa Cruz, Ecology and Evolutionary Biology Department and UC Natural Reserves, 1156 High St, Santa Cruz, CA 95064 USA

\*Correspondence to:

Dr. Hadley Wilson Horch, Department of Biology, Bowdoin College 6500 College Station, Brunswick ME 04011 USA. Phone: 207-798-4128; FAX: 207-725-3405; Email: [hhorch@bowdoin.edu](mailto:hhorch@bowdoin.edu)

### Supplemental Materials:

Counts matrix for all samples.

Files listing all up- and downregulated transcripts found to be significant at or below  $p=0.05$  by DESeq2 (DEslist) or by EdgeR (EDRlist) are included. Column headings for all files: qaccver (Query accession.version) saccver (Subject accession.version), qstart (start of alignment in query), qend (end of alignment in query), sstart (start of alignment in subject), send (end of alignment in subject), bitscore, qframe (Query frame), evalue (expect value), sframe (Subject frame), ssciname (Subject Scientific Name), scomname (Subject Common Name), salltitles (All Subject Titles).

Blast2Go results are included for all up- and down-regulated transcripts.

Swiss-Prot results are included for all up- and down-regulated transcripts.
